# Nondestructive Intervention to Multi-Agent Systems through an Intelligent Agent

Jing Han<sup>1\*</sup>, Lin Wang<sup>2</sup>

**1** Key Laboratory of Systems and Control, Academy of Mathematics and Systems Science, Chinese Academy of Sciences, Beijing, China, **2** Department of Automation, Shanghai Jiao Tong University, Shanghai, China

## Abstract

For a given multi-agent system where the local interaction rule of the existing agents can not be re-designed, one way to intervene the collective behavior of the system is to add one or a few special agents into the group which are still treated as normal agents by the existing ones. We study how to lead a Vicsek-like flocking model to reach synchronization by adding special agents. A popular method is to add some simple leaders (fixed-headings agents). However, we add one intelligent agent, called 'shill', which uses online feedback information of the group to decide the shill's moving direction at each step. A novel strategy for the shill to coordinate the group is proposed. It is strictly proved that a shill with this strategy and a limited speed can synchronize every agent in the group. The computer simulations show the effectiveness of this strategy in different scenarios, including different group sizes, shill speed, and with or without noise. Compared to the method of adding some fixed-heading leaders, our method can guarantee synchronization for any initial configuration in the deterministic scenario and improve the *synchronization level* significantly in low density groups, or model with noise. This suggests the advantage and power of feedback information in intervention of collective behavior.

**Citation:** Han J, Wang L (2013) Nondestructive Intervention to Multi-Agent Systems through an Intelligent Agent. PLoS ONE 8(5): e61542. doi:10.1371/journal.pone.0061542

**Editor:** Jesus Gomez-Gardenes, Universidad de Zaragoza, Spain

**Received:** February 28, 2013; **Accepted:** March 9, 2013; **Published:** May 2, 2013

**Copyright:** © 2013 Han, Wang. This is an open-access article distributed under the terms of the Creative Commons Attribution License, which permits unrestricted use, distribution, and reproduction in any medium, provided the original author and source are credited.

**Funding:** This work is supported by the National Natural Science Foundation of China (No. 60574068, No. 61104137), the Knowledge Innovation Program of the Chinese Academy of Sciences (Grant No. KJCX3-SYW-S01), the Research Fund for the Doctoral Program of Higher Education of China, and the National Key Basic Research Program of China (No. 2010CB731403). The funders had no role in study design, data collection and analysis, decision to publish, or preparation of the manuscript.

**Competing Interests:** The authors have declared that no competing interests exist.

\* E-mail: hanjing@amss.ac.cn

## Introduction

Multi-agent methodology is a natural and popular way to model a system consisting of many locally interacting individuals (units). Collective behavior such as phase transition, flocking/schooling/herding [1], pattern formation, swarm intelligence [2], synchronization [3][4][5], crowd panic [6], locust collective motion [7] and group decision [8], are widespread and abundant at the macroscopic level of multi-agent systems.

In a distributed multi-agent system, there is no central controller. Usually agents interact locally. The set of rules (or mechanisms) describing the interaction between two agents are called 'local rules'. If the local rule is elaborately designed, the system will show expected and useful function, such as swarm intelligence. However, for some systems, the self-organized collective behavior is not what we expect. Then, how do we intervene in the system and change the collective behavior? One way is to re-design the multi-agent system. For example, re-design the local rule of the agents. That is actually about the problem of how to design a distributed system. Examples include formation control [9] for robots, ant colony algorithm [10] and distributed algorithm for constraint satisfaction problems [11], etc. By doing this, the system will self-organize to the desired collective behavior. Another method is to put some special agents into the system to coordinate the collective behavior, such as leaders with stronger influence [12], virtue leaders [13] and mediators [14], etc. Both of

these methods require additional abilities of the existing normal agents to recognize and interact with the special ones.

The other way is to use nondestructive intervention methods. In many real world systems, such as birds and crowds, the interaction rules among individuals are part of the natural mechanism. They can not be re-designed to achieve the desired collective behavior. Therefore, the coordination should not change the interaction rules of the existing agents (normal agents). Meanwhile, in these decentralized systems there is no central controller who sends orders to agents, nor can global parameter be adjusted to change the collective behavior either. In this case, how do we softly intervene in the system and guide the collective behavior?

For some multi-agent systems, adding a few agents into the system is allowed. One way to intervene in the system is to add one (or more) special agent(s), called a '*shill*', which is treated as a normal agent by normal ones. The shill is not like the stronger influential leader [12], virtue leader [13] or mediator [14] which should be treated differently by normal agents. The influence of a shill and that of a normal agent are equal in strength, while stronger influential leaders or mediator have more influence on others than normal agents. Thus, by adding a shill, influence is 'softly' put on the system, which is called 'soft-control' [15][16]. Examples of such include adding some shills to promote cooperation in the population playing repeated Prisoner Dilemma games [17], or using ad hoc team agent (can be regarded as a shill) as a teacher to lead the other agent in the multi-armed bandit problem to maximize team utility [18], etc.

Synchronization is one of the most basic yet important collective behavior, which has profound impacts on many systems [3] [4]. A related classical model for studying synchronization, the Vicsek's model [19] (including its variant MAS models) is widely studied by physicists, mathematicians and control scientists in the current decade [20]–[32]. In these models, each agent moves with a constant speed and its heading is updated based on the average headings of its neighbors (including itself). It is a simple but nontrivial model. It displays a rich set of phenomena, such as flocking/schooling/herding behavior, strong coupled and dynamical interaction networks, and the phase transitions of synchronization.

In situations where the initial configuration of the system does not satisfy the synchronization condition, intervention is needed to help synchronize the system – skills are added into the system. There are four related approaches: (1) For the Vicsek's model without noise, an early attempt to intervene and guide synchronization is described in [15][16], where a skill with a fixed desired heading is simply placed near the agent with the worst heading at every time step. Then the system can converge to the desired heading asymptotically. (2) Later in [30], a number of leaders (fixed-heading skills with desired moving direction) are randomly distributed among the group of normal agents inside the initial area. Leaders simply move with a fixed heading forever and they have impact on their neighboring normal agents. They provide a theoretical proof of the proportion of leaders needed to guide a group to synchronization almost surely when the group size is large enough. (3) For the linear-Vicsek's model without noise, Jadbabaie et al. [20] added a special agent (fixed-heading skill with desired moving direction) to guide the group. They point out that the key is to maintain the connectivity of union of neighboring graphs consisting of all agents within some contiguous and bounded time intervals. However, they did not provide the algorithm of how the special agent moves to guarantee such connectivity. (4) Based on a different flocking model, Couzin et al. [8] studied how a few informed individuals (who know the direction to a resource) influence the moving decision of animal groups. They reveal that the larger the population the smaller the proportion of informed individuals that is required to guide the group by simulations.

In the above approaches, skills of [15][16], informed individual [8], leader [30] and special agent [20], are all **fixed-heading skills**. These skills are too simple because they do not use online feedback information to adjust their moving direction. A simple skill has limited intelligence and power. Therefore, one simple fixed-heading skill is unlikely to guide the group to synchronization. With more skills, the system is more likely to become synchronized. For this reason papers [8] and [30] focus on the number of skills. Their method only works in the probabilistic scenario for high density groups for the Vicsek's model. This is because once a normal agent moves outside the neighborhood of fixed-heading skills, it will never be affected in the future. The method in [15] can promise synchronization for any initial configurations in the deterministic scenario, and only one skill is needed. However, although the heading of the skill is fixed, it is not moving in a fixed direction. Actually it is arbitrarily placed in different target positions during evolution. Although online feedback information of locations and headings of agents is exploited by the skill, it is only used for the selection of target positions, not for the decision-making of the schematic movements of the skill. It does not solve the basic problem of how a skill moves from one location to another without putting negative effects (i.e., drawing heading of agents to a non-desired direction) on the group. There is no proof for the skill speed limitation and its

moving direction is not consistent with the heading of the skill. Therefore, it is not a complete algorithm for intelligent skills.

In this paper, a comprehensive algorithm for an efficient and intelligent skill is introduced: it has a new and subtle strategy called 'consistent moving', which uses online information of normal agents' locations to determine and update its heading at each step. The skill periodically affects every normal agent and will eventually synchronize the whole group towards the desired heading. Both the mathematical analysis and the simulation results prove that the system can be synchronized by adding one intelligent skill with a limited speed. Merits of this new approach are as follow:

- (1) synchronization is guaranteed for any initial configuration in the deterministic scenario by adding only one intelligent skill;
- (2) the strategy is much more clever and the heading of the skill is consistent with its actual moving route, so this is the first comprehensive approach for intelligent skill with theoretical analysis;
- (3) by using feedback information, the intelligent skill is possible to handle noise in the Vicsek's model, which cannot be achieved with fixed-heading skills.

We will demonstrate these advantages in the computer simulations by comparing with the method of adding some fixed-heading skills (leaders). It shows that one intelligent skill can perform better when measured by the synchronization level, especially in low density groups. Besides, the intelligent skill has significant advantages in the case of noise. It implies that feedback information is essential for intervention in the model with noise.

For nondestructive intervention of collective behavior of multi-agent systems, adding skills is a feasible method. Although skills have only the same strength of influence on neighbors as normal agents do, they can have a bigger impact on the collective behavior of the group, depending on the number of skills that are added into the system and how intelligent the skills are. Without using feedback information, skills are not intelligent and more than one skill is needed to guide the group [8] [30]. Our approach in this paper confirms skills can become more powerful with feedback information. One intelligent skill is able to guide the whole group, and it can also handle more complicated cases.

## Methods

### The Multi-agent model

Flocking of birds, schooling of fishes and herding of sheep are ubiquitous in nature. In 1987, Reynolds, a computer scientist, might be the first to propose a computer simulation which can show flocking phenomena [1]. It is a multi-agent system with three simple local rules for each interacting agent: Alignment, Separation and Cohesion. Later in 1995, from a different viewpoint physicists Vicsek et al. introduced a simplified model, which only keeps the Alignment rule - steer towards the average heading of neighboring agents. Two agents are neighboring to each other if the distance between them is not larger than a given constant  $r$ . In spite of its simplicity, the self-order motion, a flocking-like cooperative behavior, emerged in this simplified system. Although in reality the physical and biological systems are more complicated, many of them are based on this model more or less [33]–[35].

The Vicsek-like model we adopt in this paper is described below: there are  $n$  agents all moving simultaneously in the unlimited two-dimensional space. They are represented by heading set  $\theta = (\theta_1, \theta_2, \dots, \theta_n)$  and location set  $X = (X_1, X_2, \dots, X_n)$ , where  $X_i = (x_i, y_i) \in \mathbb{R}^2$  denotes the

$x$ -coordinate and the  $y$ -coordinate of the location of agent  $i$ . The velocity of agent  $i$  at time  $t$  is  $V_i(t) = (v \cos(\theta_i(t)), v \sin(\theta_i(t)))$ , constructed to have a constant speed  $v$  and a heading given by the angle  $\theta_i(t) \in [0, 2\pi)$ . Neighbors of agent  $i$  at time  $t$  are those agents which are either in or on a circle of a constant radius  $r$  centered at agent  $i$ 's current position. So the neighborhood is defined as

$$N_i(t) = \{j | \|X_j(t) - X_i(t)\| \leq r, j = 1, 2, \dots, n\}. \quad (1)$$

Agent  $i$  updates its heading and position according to equations as follow:

$$\theta_i(t+1) = \arctan \left( \frac{\sum_{j \in N_i(t)} \sin(\theta_j(t))}{\sum_{j \in N_i(t)} \cos(\theta_j(t))} \right), \quad (2)$$

$$X_i(t+1) = X_i(t) + V_i(t)\Delta t. \quad (3)$$

where  $\theta_i(t+1)$  is the angle of the sum of the velocity vector of all neighboring agents, and the time unit  $\Delta t = 1$  is the time interval between two updates.

### Adding an intelligent skill

The computer simulation of the above model shows that given different initial configurations (initial locations and headings of  $n$  agents), the system will exhibit different phenomena: agents evolve to a same heading, i.e., synchronization; or agents separate into several subgroups with different headings and never merge again especially when the space is unlimited (see Fig. 1(a)–(b)). Papers [27][28] show that when the density of the group is high enough, the group will self-organize to synchronization with large probability. It is more likely to separate into several sub-groups than in model with periodical boundary space. So an important question is: how do we intervene in the system and lead all agents synchronizing towards a desired heading if the self-organized heading is not what we expect or the group separates into subgroups? In this paper, one intelligent skill is added into the group to guide the system to synchronize towards a desired heading (see Fig. 1(c)–(d)). Because the skill is artificial, we can design its moving strategy for this purpose. The rest part of this paper solves the following problem:

**Problem definition.** considering the Vicsek-like model defined above. Given any initial configurations that consist of  $n$  normal agents randomly and uniformly distributed inside a finite size area (a square with length  $L$ ) and with headings randomly picked up from  $(-\pi/2, \pi/2)$  with uniform probability. Agents move in the unlimited two-dimensional space following local rules of (2) and (3). A skill is added to guide all normal agents synchronizing towards a desired heading  $\theta^* = 0$ , i.e.,  $\max_{i \in \{1, \dots, n\}} \cos \theta_i(t) \rightarrow 1$  when  $t \rightarrow \infty$ . What is the strategy (dynamics) for the skill to complete the task?

As we have pointed out, the difficulty is how the skill decides the moving direction for each step using online feedback information. Especially, how a skill moves from one target agent location to another without putting negative effects on others is challenging. This paper gives a solution by proposing a novel strategy for the skill called ‘consistent moving’ (demos see Video S1). In the following, attributes of the skill are described, and then the moving strategy is introduced.

The position, heading and speed at time  $t$  of the skill are denoted as  $X_0(t)$ ,  $\theta_0(t)$  and  $v_s(t)$  respectively. The neighborhood structure of a skill is the same as normal agents. The skill will affect a normal agent  $i$  if it is in the neighborhood of agent  $i$ , i.e.,  $\|X_0 - X_i\| \leq r$ . Since normal agents treat a skill as a normal one, normal agents still keep their update rules defined in equations (2) and (3) except that the definition of neighborhood  $N_i(t)$  includes the skill as well:

$$N_i(t) = \{j | \|X_j(t) - X_i(t)\| \leq r, j = 0, 1, 2, \dots, n\}. \quad (4)$$

Therefore, the way normal agents treat a skill is the same as the way they treat normal ones. So skills have only the same strength of influence on neighbors as normal agents do.

There are differences between the skill and the normal agent: (a) The skill does not need to follow the normal agent's local rule of equation (2). Its moving strategy can be re-designed, which is called ‘consistent moving’ in this paper; (b) The skill can use online feedback information of normal agent location; (c) The skill is allowed to speedup and slowdown during the evolution, so  $v_s$  is not a constant but satisfies  $v_s(t) \leq v_0$  for all  $t \geq 0$ , where  $v_0$  denotes the *maximal skill speed*.

To affect the heading of a normal agent  $i$ , the skill should be inside the neighborhood of agent  $i$ . While the skill is neighboring to agent  $i$ , if the heading of the skill  $\theta_0$  is zero (the desired heading),  $\theta_i$  (the heading of agent  $i$ ) will be drawn towards to direction zero rapidly within a few steps, which is considered as a positive effect on agent  $i$ ; if  $\theta_0$  is not zero, the skill will lead  $\theta_i$  to other direction, which is considered as a negative effect on agent  $i$ . So to guide agent  $i$  and make  $\theta_i \rightarrow 0$ , the skill first moves close to the left side of agent  $i$  (see Fig. 2(a)), then changes to heading zero, moves forward and hits agent  $i$ . It should keep staying with agent  $i$  for a few steps till  $\theta_i$  is small enough ( $|\theta_i| < \varepsilon$ ). Therefore, to guide one agent is not difficult. But to guide the whole group we need to consider two basic problems in the skill moving strategy:

(1) When to affect a normal agent? Does the skill need to affect all normal agents one by one repeatedly? Which agent should be selected as the next target to be affected? What are the criteria for selection? Jadbabaie et al. [20] gave a preliminary result on a condition of synchronization for the linearized Vicsek's model, which showed that the connectivity of the union of neighbor graphs within some time-interval can guarantee synchronization. Inspired by this result, the first principle of the ‘consistent moving’ strategy is: **the skill should periodically affects every agent directly or indirectly with heading zero.**

In a period, the order for target agent selection does not affect whether or not the skill can complete the task, but it might affect the convergence time. The simplest schedule in a period is to affect agents in a fixed order:  $1 \rightarrow 2 \rightarrow 3, \dots, \rightarrow n$ . But we found from simulations that if an agent shows the trend of moving far away from the group centroid, it should be selected by the skill with a high priority. Otherwise that agent will move far away from the group and the skill will have to spend much more time to catch up with it. So in this paper the agent which has the biggest growth of distance from the group will be picked up first.

(2) What is the moving route of the skill from one location to the next target agent location? This is the core of the strategy. Note that if the skill is not always moving with the desired direction (heading zero), it will have negative effects on its neighboring normal agents. However, if the skill moves with a fixed heading of zero, it could never get to some locations. One solution is to allow the skill to change heading but make sure not to put negative effect on any normal agent during its movement. This can be described

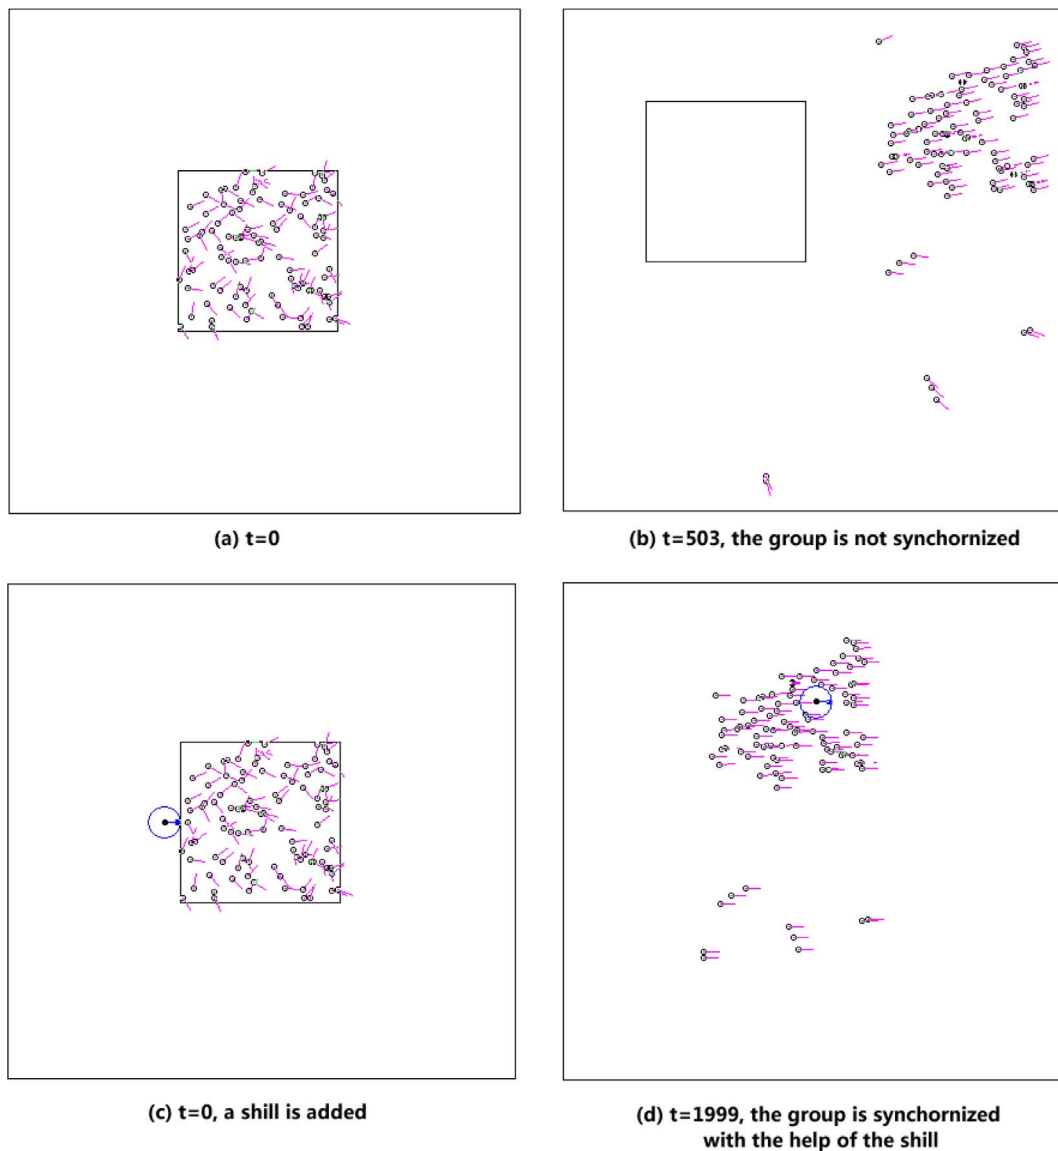

**Figure 1. Snapshots of computer simulation.** Velocities of agents are displayed for two cases: a self-organized group and a group with one skill. The number of agents is  $n=100$  in each case. Normal agents are represented by the little circle with red line pointing to the moving direction. (a) and (b) are for the self-organized case. (a)  $t=0$ ,  $r=1$ ,  $v=0.03$ .  $n=100$  agents are randomly distributed inside a square with  $L=10$ . (b) After 503 steps, the system reaches to a situation of several separated subgroups with different moving directions. So the group does not self-organize to a same heading -synchronization. (c) and (d) are for the case with a skill: (c)  $t=0$ , a skill with  $v_0=0.3$  is added into the same group as shown in (a). The skill is denoted as a dark little dot with blue arrow pointing to its heading direction. The blue circle centered at it indicates its neighborhood area (the radius is  $r=1$ , which is the same as the radius of normal agents). (d) With the help of the skill using 'consistent moving' strategy, after 1999 steps, headings of all agents converge to a desired heading (zero), i.e.,  $\max_i \cos \theta_i \geq 0.9999$ .

doi:10.1371/journal.pone.0061542.g001

as the second principle: ***'the skill should always keep heading zero (the desired heading) if it has neighboring agents; only when it has no neighbors can it have a non-zero heading'***. A subtle algorithm is designed based on this principle. It is a comprehensive algorithm for an intelligent skill.

The simplest idea for a skill to move from one target agent location to another is shown in Fig. 2(a). It first goes forward with heading zero till far away from the group, then makes a big U-turn outside the group area and gets back to the left side of the whole group, finally hits the target with heading zero. With a speed which is faster than  $v$  the skill can make this kind of route and it will not meet any normal agent during the U-turn process even

considering the normal agents are moving. The mathematical proof shows that the skill with a limited  $v_0$  can affect every agent inside a period and lead the group to synchronization.

However, this simple route is not efficient. In fact, the skill can find a shorter route shown in Fig. 2(b). The skill can move inside the group area with a much more refined and careful path as long as it avoids meeting any normal agents when its heading is not zero. This shortcut is very subtle in this case. It is produced by a finite-state machine (See Appendix S1), which is based on the simple route idea with some heuristics for finding shortcuts.

With a skill, the overall system evolves in this way: firstly,  $n$  normal agents and a skill randomly and uniformly distributed

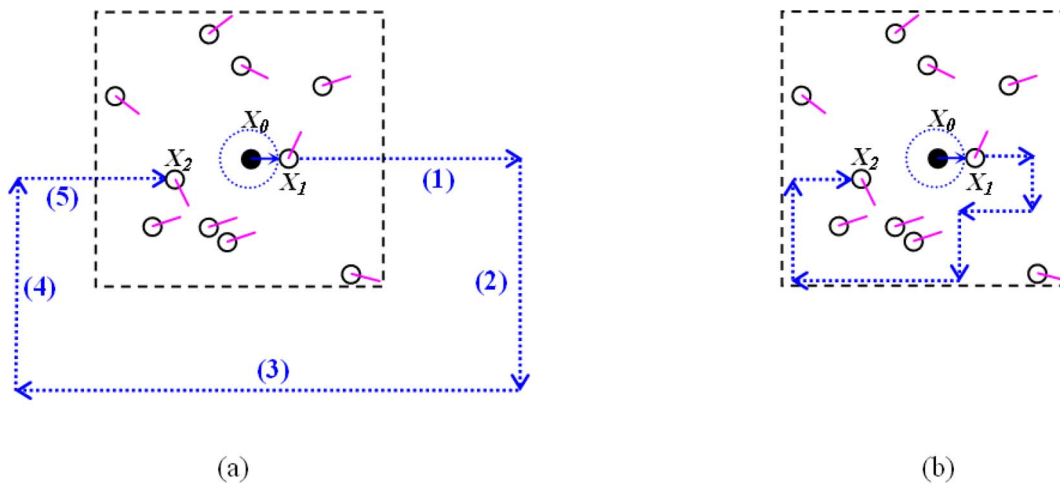

**Figure 2. Examples of the moving route from location of agent 1 ( $X_1$ ) to location of agent 2 ( $X_2$ ) for the shill (starting from location  $x_0$ ).** The big dash-line square indicates the current group area (note that to show ideas of the shill route, for convenience, the group area shown here is supposed to be static. In fact, the actual consistent moving strategy considers the cases that normal agents are moving when the shill moves, i.e., the group area keeps changing, which is much more complicated.). Two moving routes for the shill are shown: **(a) a simple U-turn route:** first it goes forward to a location which is much far away from the whole group (dash line part (1)), then it makes a big U-turn (dash line parts of (2)–(3)–(4)) far away outside the group area and gets back to the left side of the whole group, finally goes forward and affects agent 2 (dash line part (5)). Its heading is set to be zero in parts (1) and (5), while it can have different headings during (2)–(3)–(4) because there are no neighboring agents. **(b) A more efficient route** for the shill moving from agent 1 to agent 2. Radius of the small dash line circle centered at the shill represents the neighborhood size  $r$  which is the same as the radius of normal agents. The shill tries to find a shorter route which maintains a ‘safe’ distance (larger than  $r$ ) away from any normal agent when its heading is not zero. It is much more efficient than the simple U-turn route.

doi:10.1371/journal.pone.0061542.g002

inside a finite size area. During evolution, at each step, normal agents update their headings according to equations (2) and the shill updates its heading according to the finite-state machine (Fig. S1 in Appendix S1). And then they simultaneously update their positions using equation (3). In computer simulations, the evolution stops when the system reaches the synchronization criterion, i.e.,  $\max_{i \in \{1,2,\dots,n\}} \cos \theta_i(t) \geq 1 - \varepsilon$  with  $\varepsilon > 0$ .

The section of theoretical result below will give a rough upper-bound for the speed of the shill which can guarantee the evolution will stop in finite steps for any  $\varepsilon > 0$ . This means that the shill with a speed not larger than the bound value can guide all agents’ headings converge to zero. The computer simulation results will exhibit that with  $v_0 = 1.5v, 2v$  and  $5v$ , the evolution can stop in finite steps for  $\varepsilon = 0.0001$ , which means that in practice the shill can synchronize the group with a speed much lower than the theoretical bound.

## Results and Discussion

### Theoretical result

For compact construction and easy understanding, we will present the theoretical result in this subsection, and give a detailed mathematical proof in Appendix S2.

From the above section, we know the following two principles, denoted by **L**, are satisfied:

- i) **The shill always keeps the desired heading  $\theta^*$  when it has neighboring agents. That is to say, the heading of the shill felt by normal agents is always  $\theta^*$ ;**
- ii) **All agents will be directly or indirectly affected periodically by the shill in a time period  $H$ .**

Note that in (i),  $\theta^* = 0$  in this paper. But in fact, the proof is truth for any  $\theta^* \in (-\pi/2, \pi/2)$ .

An essential problem we concerned about is that can the shill with a limited speed accomplish periodical intervention? We know that if all normal agents can be covered by a limited circle in every time step, the shill can finish its task with a limited speed. On the other hand, if the minimal circle which covers all normal agents becomes bigger and bigger during evolution, the shill will have to keep accelerating to make sure it can catch up and affect all agents in a fixed period. Thus, the question can be translated to whether all normal agents can be covered by a limited circle during the whole evolution process.

For the group, we define a dynamic reference point  $\bar{X}(t) = (\bar{x}(t), \bar{y}(t))$  as follows:

$$\begin{cases} \bar{x}(t+1) = \bar{x}(t) + v \cos \theta^* \\ \bar{y}(t+1) = \bar{y}(t) + v \sin \theta^* \end{cases} \quad (5)$$

where  $(\bar{x}(0), \bar{y}(0))$  is the center of the minimal circle covering all normal agents in the initialization. Fig. 3 shows the dynamical circle covering locations of all normal agents. Note that the reference point is virtual and has no influence on the other agents. We will see that at time  $t$  all normal agents will be covered by a circle centered at  $(\bar{x}(t), \bar{y}(t))$  with a fixed radius.

**Theorem 1** *If the shill strategy satisfies condition **L**, it can lead*

- i) *headings of all normal agents exponentially converge to the desired value  $\theta^*$ , and*

$$\max_{i,j \in \{0,1,2,\dots,n\}} |\tan \theta_i(t) - \tan \theta_j(t)| \leq b \lambda^{t-1} \Delta_0,$$

where

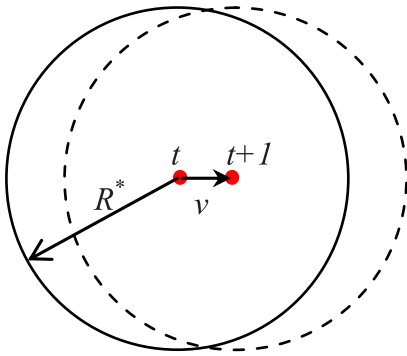

**Figure 3. The locations of all normal agents can be covered by a circle centered at a reference point (little dot) with a fixed radius  $R^*$  at every step.** Solid-line circle represents the location area of time  $t$ . As the reference point is moving with speed  $v$  and desired direction  $\theta^*=0$ , the location area of time  $t+1$  is presented by the dashed-line circle.

doi:10.1371/journal.pone.0061542.g003

$$b = \sigma^{-1}, \quad \lambda = \sigma^{\frac{1}{\mu}}, \quad \sigma = 1 - \left(\frac{\cos \bar{\theta}}{n+1}\right)^{\mu}, \quad \mu = nH, \\ \bar{\theta} = \max_{i \in \{0, 1, 2, \dots, n\}} |\theta_i(0)|, \quad \Delta_0 = \max_{i, j \in \{0, 1, 2, \dots, n\}} \{\tan \theta_i(0) - \tan \theta_j(0)\},$$

- ii) *locations of all normal agents can be covered by a circle with a fixed radius  $R^*$  at every step, and*

$$\bar{d}_i(t) \doteq \|\bar{X}(t) - X_i(t)\| \leq R^*, \quad \forall t \geq 0, \quad \forall i \in \{1, \dots, n\},$$

where

$$R^* = D + vb\Delta_0 \frac{2-\lambda}{1-\lambda},$$

$D$  is the radius of the minimal circle enclosing all the normal agents at time 0.

The mathematical result shows that with the help of a skill using ‘consistent moving’ strategy, the size of the group area is always limited during the evolution. This means the distance between any two normal agents is always limited. So with a limited speed, the skill can move from one agent’s location to any other agent’s location within limited steps.

It can be found that with some speed not larger than  $2R^* + 3v$ , the skill can pass across the whole group in one step and have no neighbors in the next step. Thus, for any given period  $H$ , we can set  $v_b$  – the bound value of the skill speed, to be  $2R^* + 3v$ . In particular, some speed not larger than  $v_b = 2R^* + 3v$  can ensure the skill to take the big U-turn route shown in Fig. 2(a) and directly affect each normal agent at least once in a period of  $H = 5n$ . Therefore, the skill can accomplish its task to synchronize all normal agents with a limit speed.

Note that  $v_b$  is only a rough upper-bound value, which is in order to show that with a limited speed the skill can perform the periodical intervention and synchronize the system. Actually we can see in the following computer simulations, the skill with a speed much lower than  $v_b$  can synchronize the group in practice.

## Computer simulations

The settings of parameters in simulations are as follow: neighborhood radius  $r=1$  and normal agent speed  $v=0.03$ , which are adopted from the Vicsek’s paper [19]; the initial location area is a square with length  $L=10$ ; different group sizes  $n=10, 30, 50, 100, 200, 300, 400$  are tested, so the corresponding initial densities  $\rho = n/L^2 = 0.1, 0.3, 0.5, 1, 2, 3$ ; different skill maximal speeds  $v_0 = 1.5v, 2v, 5v, 10v, \infty$  are tested.  $v_0 = \infty$  means that once the skill affects the target agent, it will slow down a bit if there are neighbors around, otherwise it will get to the position of the next target agent in the next step, no matter how big the distance between them. For each realization, the simulation will stop when the synchronization criterion  $\max_i \cos \theta_i > 0.9999$  is satisfied. For

each  $n$  and  $v_0$ , we test 500 realizations starting from different random initial configurations. For each realization, the total number of steps (denoted as *totalStep*) is measured, which means that the system is synchronized after *totalStep* steps.

**Can one intelligent skill synchronize the system within limited steps?** How does the skill maximal speed  $v_0$  affect the performance? What if  $v_0$  is much smaller than the theoretical bound  $v_b$ ? How does the group size  $n$  affect the performance? Fig. 4 answers the above questions. It shows that one intelligent skill with ‘consistent moving’ strategy can synchronize the group within limited steps.

With  $v_0 = 1.5v, 2v, 5v \ll v_b$ , the skill still works for the synchronization task within finite steps. Because small  $v_0$  requires longer time for the skill to catch up with target agents, the system needs a larger *totalStep* to reach synchronization. Note that  $v_0$  should be larger than  $v$  (the speed of normal agents), otherwise the skill will never catch up with and affect a running-away normal agent.

The impact of group size  $n$  is twofold. When the group size  $n$  is larger, the skill needs to affect more agents. From this aspect, larger  $n$  requires more steps for synchronization. On the other hand, because the initial area is fixed, larger  $n$  means higher initial density. As the theoretical result shows, higher density implies larger probability of self-organized synchronization [26]. Therefore, larger  $n$  (density) means that the system is more likely to self-organize to synchronization and the group is more connected. The radius of the minimal circle which covers all normal agents will be smaller. It takes less time for the skill to guide the group. From this aspect, larger group needs less intervention from the skill. These two effects work together and the overall impact of  $n$  can be found from Fig. 4: when  $v_0$  is small, cases with small  $n$  (low density groups) take a longer time (larger *totalStep*) for convergence; when  $v_0$  is large, cases with larger  $n$  take a longer time for convergence. For example, the peak of *totalStep* for the case of  $v_0 = 1.5v$  locates at  $n = 30$ , and then shift to  $n = 50$  for  $v_0 = 2v$ ,  $n = 100$  for  $v_0 = 5v$  and  $n = 200$  for  $v_0 = 10v$ . This is because when the skill moves with a slow  $v_0$ , it takes a long time to catch up with the target agent, so the group is more likely to separate into several subgroups soon in the beginning if the initial group density is low. Consequently distances between two target agents become very large and the skill takes a much longer time to move from one target agent location to the next target agent location. Thus, the convergence time is significantly increased. When  $v_0$  increases, the skill can efficiently stop the separation in the beginning and quickly move to the next target agent location, so what matters the *totalStep* is the number of normal agents that are needed to be affected in one period. Therefore, cases with larger  $n$  need longer time for convergence.

It is worthy to point out that small  $n$  (low initial density) is more challenging for the skill when  $v_0$  is small. Because for dense groups, the best choice of the skill is the U-turn route which can be



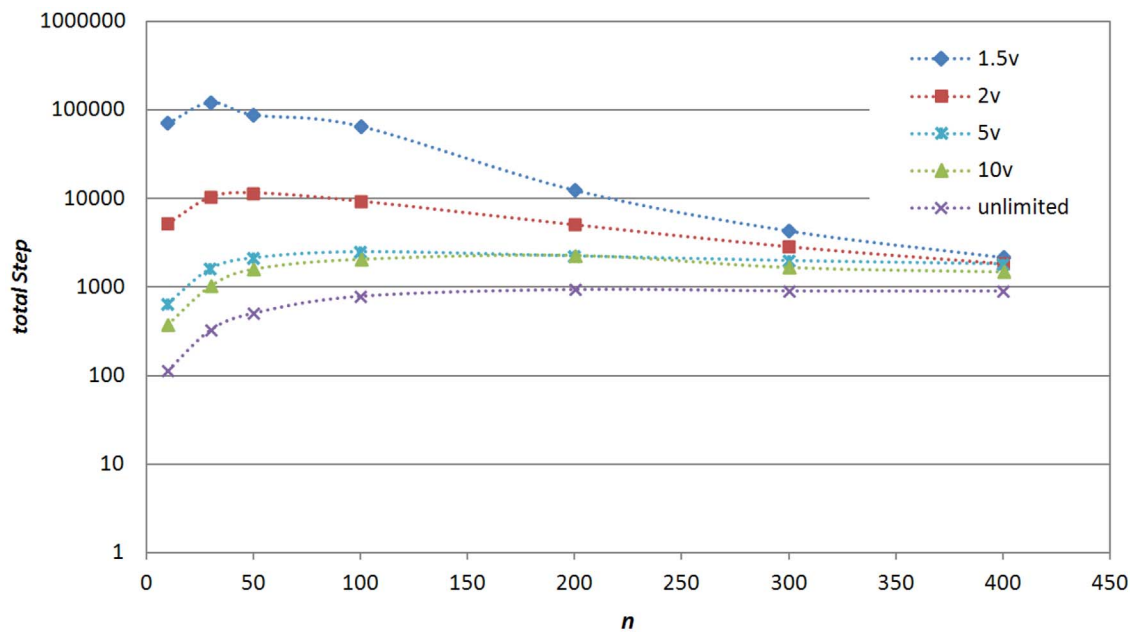

**Figure 4. Mean totalStep (over 500 realizations) for synchronization ( $\max \cos \theta_i > 0.9999$ ) under different settings of  $n = \{10, 30, 50, 100, 200, 300, 400\}$  and  $v_0 = \{1.5v, 2v, 5v, 10v, \infty\}$ , when one intelligent skill is added.**  
doi:10.1371/journal.pone.0061542.g004

produced by simple algorithms. But for low density cases, the group tends to separate into several subgroups more quickly in the beginning; to be efficient, the skill needs to find subtle shortcuts passing inside the group like Fig. 2(b), which can significantly reduce the convergence time compared to the simple U-turn route. Our method, the finite-state machine shown in Fig. S1 of Appendix S1, can automatically produce both simple U-turn route for low density groups and subtle shortcuts for dense groups. So the skill using this strategy shows computational intelligence and it can efficiently guide the group.

**Comparing with a number of fixed-heading skills - model without noise.** As mentioned in the introduction section, adding a number of fixed-heading simple skills is a method to coordinate headings of a group with dense population. It is proved that if the proportion of fixed-heading skills (informed agents) is equal to or greater than  $2.7111 \left( \frac{\log^{3/4} n}{\sqrt[n]{n}} \right)$  [30], all agents can be

led to move along the expected direction with probability of 1 when the group initial density is big enough. Compared to the case of adding one intelligent skill, which method is better? What if the group density is low? We know that the group can converge to heading zero with one intelligent skill, so do headings of all agents converge to zero with some fixed-heading simple skills? If not, what is the convergence value?

In simulations,  $n_f$  simple skills with fixed heading zero are added into the system. They are randomly distributed uniformly in the initial square area. And then let the system evolve till  $\max_i \cos \theta_i$  converges to a static value.  $n_f = 0.1n, 0.2n, 0.5n, 0.8n$  and  $n$  are tested for  $n = 10, 30, 50, 100, 200, 300$  and 400 respectively. Fig. 5 shows the *synchronization level*, i.e., mean convergence value of  $\max_i \cos \theta_i$ , for three cases: ‘adding  $n_f$  fixed-heading skills’, ‘self-organized’ (without intervention) and ‘adding one intelligent skill’. We can see that for the self-organized behavior, the *synchronization level* is the lowest, but it increases with  $n$ . It almost self-synchronizes when  $n = 400$ . This is the reason why we do not

test  $n > 400$  for  $L = 10$ . For the case of adding one intelligent skill, the convergence value is always 1. For the case of adding some fixed-heading skills, larger  $n_f$  leads to higher *synchronization level*. But its level is low when  $n$  is small. For example, in the system consists of  $n = 50$  normal agents and  $n_f = 50$  fixed-heading skills, the *synchronization level* = 0.748348. So for low density groups, one intelligent skill performs much better than a number of fixed-heading skills when measured by the *synchronization level*. This is because low density groups need much more fixed-heading skills to directly or indirectly influence all normal agents. But an intelligent skill with feedback information can periodically affect every agent and synchronize the group.

**Comparing with a number of fixed-heading skills - model with noise.** In the original Vicsek’ model [19], the heading update rule includes a noise part:  $\theta_i(t+1)$  equals to the angle of the sum of the velocity vectors of neighbors plus a random number  $\Delta\theta$  chosen with a uniform probability from the interval  $[-\eta/2, \eta/2]$ . They define  $v_a \doteq \frac{1}{nv} \left| \sum_{i=1}^n V_i \right|$  as the order parameter,

which can be regarded as the *synchronization level*.  $v_a = 1$  if headings of all agents are the same, i.e., the system synchronizes. In this case with noise, does the intelligent skill work for the model with noise? How does it compare to the method of adding some fixed-heading skills? What are the performance characteristics of both methods?

Fig. 6 shows that with small noise, how mean value of *synchronization level* changes during time evolution (from  $t = 1$  to  $t = 10000$ ) for both methods. The group *synchronization level* is decreasing obviously during time evolution even with the help by a number of fixed-heading skills; while adding one intelligent skill can maintain a high *synchronization level*. This is because the method of adding fixed-heading skills has a serious problem when facing noise: once an agent moves away (driven by noise) from the skills’ neighborhood, it might never be neighbors of skills since the space is unlimited and skills are moving with a fixed direction. Therefore, fixed-heading skills will lose more and more neighbors, and have less and less impact on the group during evolution. On

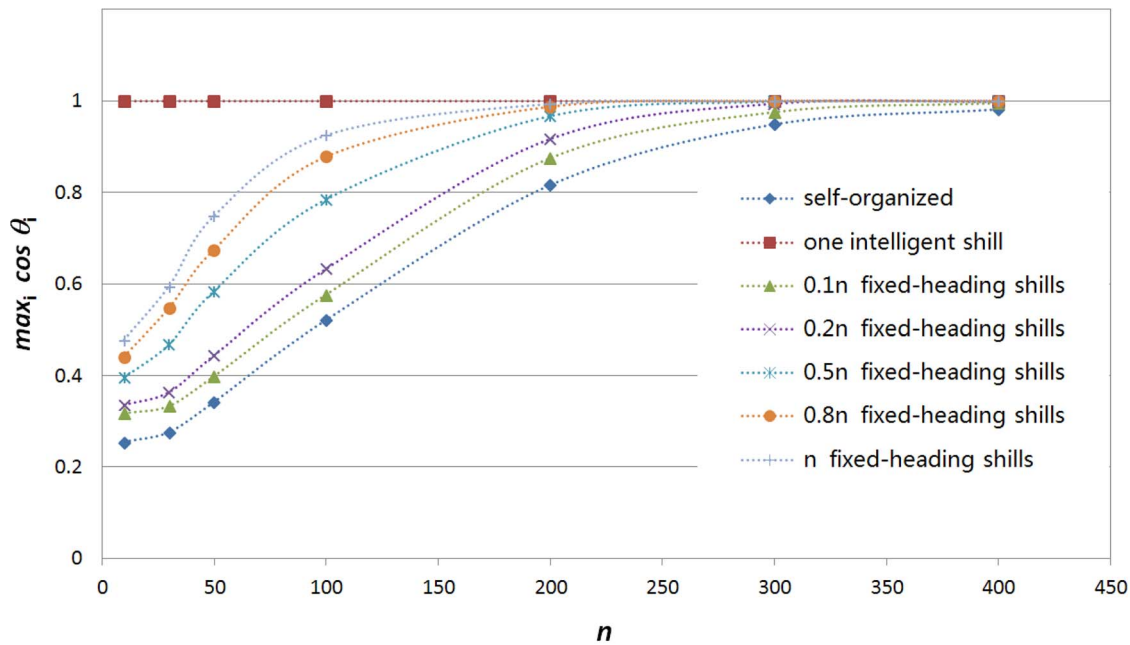

**Figure 5. Synchronization level (mean  $\max_i \cos \theta_i$ ) for  $n = 10, 30, 50, 100, 200, 300, 400$  respectively in the following cases: self-organized without any intervention; one intelligent skill with  $v_0 = 5v$  is added into the group;  $0.1n, 0.2n, 0.5n, 0.8n$  and  $n$  fixed-heading simple skills are added into the group respectively.**  
doi:10.1371/journal.pone.0061542.g005

the other hand, a theoretical result [29] shows that if the skill can affect all agents periodically, headings of all agents fluctuate around the desired heading rather than reaching it, and the range of the fluctuation depends on the magnitude of the noise. This indicates that it is impossible to maintain fully synchronization ( $v_a = 1$ ) in the model with noise, but if the skill can periodically affect all agents, it can maintain a reasonable *synchronization level*. With feedback information, the intelligent skill can adjust its moving direction and try to catch up with those running-away normal agents instead of losing them.

Fig. 7 demonstrates the mean  $v_a$  at  $t = 10000$  for both methods under different settings of noise  $\eta = 0.01, 0.05, 0.1, 0.5$  and group size  $n = 10, 30, 50, 100, 200, 300, 400$  respectively. It shows that for small noise  $\eta \leq 0.1$ , adding one intelligent skill (with  $v_0 = 5v$ ) can achieve a high *synchronization level* which is obviously higher than adding  $0.5n$  fixed-heading skills, especially for low density groups. For  $\eta = 0.05$  and  $0.1$ , compared to the case of ‘self-organized’, adding one intelligent skill can significantly promote the *synchronization level*, whereas adding  $0.5n$  fixed-heading skills can not. But for the case with big noise  $\eta = 0.5$ , none of them can promote the *synchronization level*. This is because with fluctuation the distance between agents might keep increasing and become too large; then the skill can not be able to periodically affect all agents with a limited speed.

This result shows that for small noise, one intelligent skill using ‘consistent moving’ strategy can significantly promote synchronization and perform much better than the method of adding some fixed-heading skills, because the intelligent skill can use online information to adjust its heading and try to keep up with every agent. Therefore, online feedback information of agent location is important in this sense, especially in the procedure of next target agent selection. This shows the advantages of intelligence through feedback mechanism. We notice that tightly connected group (group with high density) has low tendency of dispersion caused by noise because each agent in the group has many neighbors that

can cancel out most of the noise effect. It suggests future study of the intelligent skill to achieve better synchronization level in the noise model: for example, first the skill tries to drive all normal agents moving towards a center to form a tightly connected group, and then the skill use the ‘consistent moving’ strategy to guide synchronization.

In a word, the most important difference between methods of adding a number of fixed-heading skills and adding one intelligent skill is the feedback mechanism which brings big benefits but requires observation of information (in fact, global information is not necessary during the procedure of skill moving from one location to the next target agent location, see Appendix S1). Except this, other difference lies in: (1) the former is a method that works in the probabilistic scenario for high density groups, while the latter is a deterministic method for any initial configuration for any density. The former might not lead the group converge to the desired heading starting from some configurations, especially when the group density is low. (2) The former needs a number of skills, while the latter needs one; (3) Skills in the former method move with the same speed as normal agents, whereas the skill in the latter can adjust its heading based on feedback information and it needs a speed which must be faster than normal agents; (4) As considering the model with noise, computer simulations show that the latter performs much better than the former because the power of feedback.

## Conclusions

We have studied nondestructive intervention by adding one intelligent skill and proposed a smart strategy for the intelligent skill to coordinate synchronization of a Vicsek-like model using online feedback information, which is the first complete and feasible algorithm for this purpose. The strategy obeys two principles: (1) the skill should directly or indirectly affect all normal agents periodically; (2) by using online feedback information of



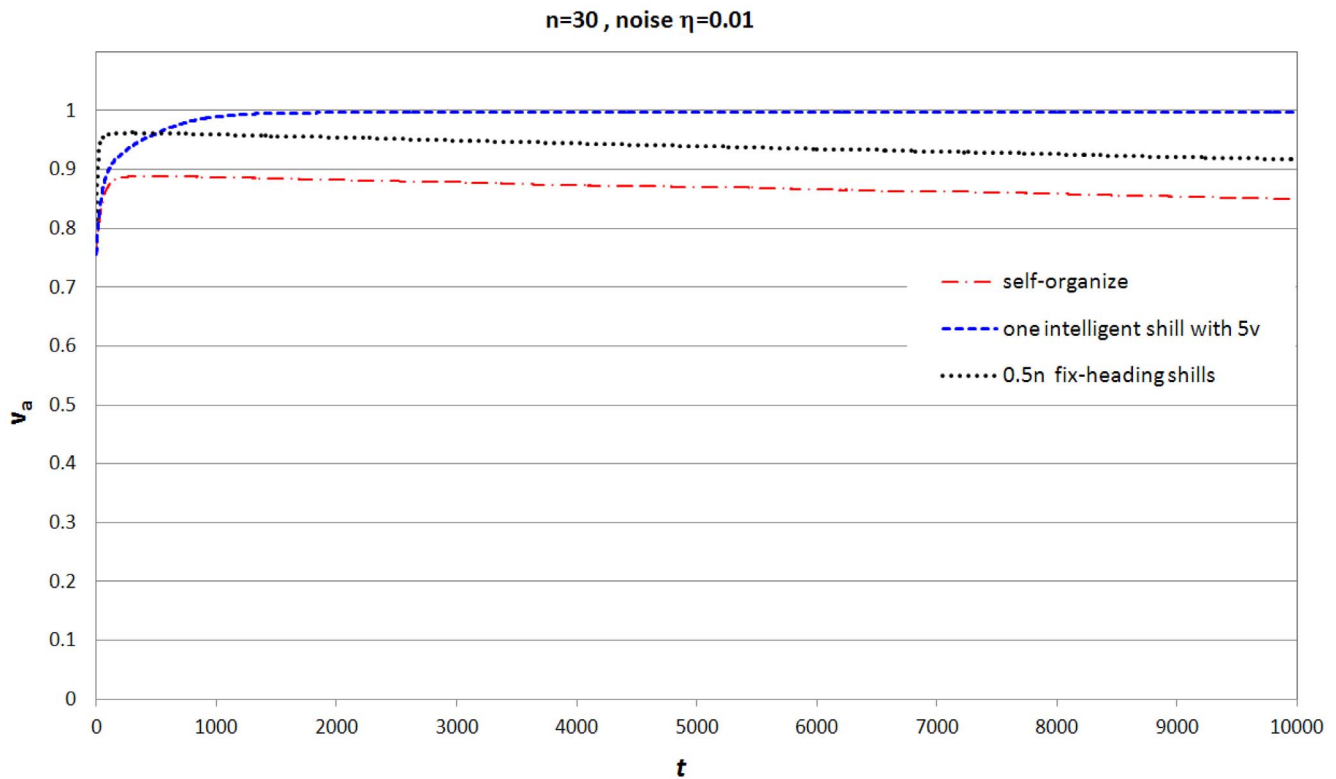

**Figure 6. Mean value (over 500 realizations) of  $v_a(t)$  during time evolution for  $n=30$  and  $\eta=0.01$  under 3 scenarios: (1)self-organized; (2)one intelligent agent with  $v_0 = 5v$  is added into the group; (3)0.5n (= 15) fixed-heading skills are added into the group.**  
doi:10.1371/journal.pone.0061542.g006

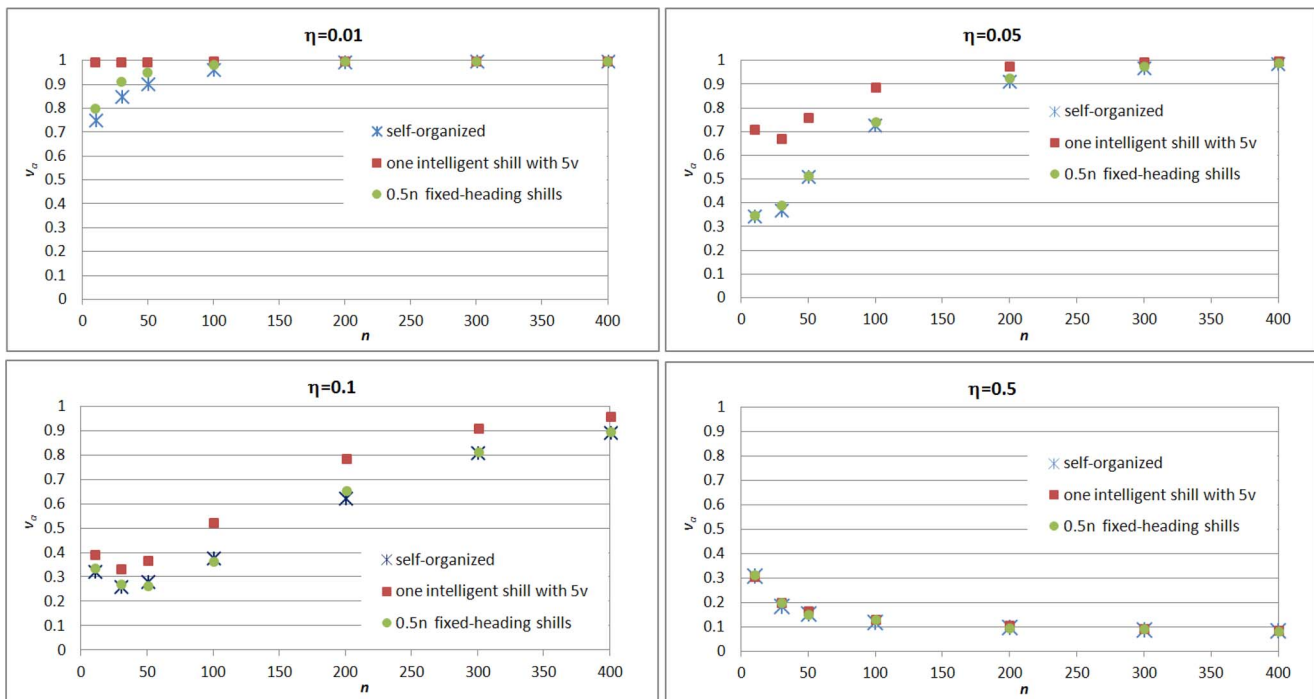

**Figure 7. Mean value (over 500 realizations) of  $v_a$  at  $t=10000$  with noise  $\eta=0.01, 0.05, 0.1, 0.5$  respectively. Three scenarios are considered for each case: (1)self-organized; (2)one intelligent agent with  $v_0 = 5v$  is added into the group; (3)0.5n fixed-heading skills are added into the group.**  
doi:10.1371/journal.pone.0061542.g007

normal agents, the skill should avoid putting negative effects on normal agents when it is moving in a non-desired direction. According to these two principles, we have designed a finite-state machine for the dynamics (moving algorithm) of the skill which can produce refined shortcut route based on the simple U-turn route. This is called ‘consistent moving’ strategy. The mathematical analysis gives a bound  $v_b$  which can ensure that the skill using ‘consistent moving’ strategy with a speed not larger than  $v_b$  can affect all normal agents inside one period. Therefore, the group can converge to the desired heading. This means that an intelligent agent with ‘consistent moving’ can synchronize the group with a limited speed. Computer simulations show that a skill with speeds  $v_0 = 1.5v, 2v, 5v$  which are much lower than  $v_b$  can lead the group to a synchronized state ( $\max_i \cos \theta_i > 0.9999$ ) within finite steps. With larger  $v_0$ , the group can converge faster. Compared to the method of adding a number of fixed-heading skills, our method performs better in terms of *synchronization level*, especially for low density groups and model with noise. This is mainly due to intelligence of the skill with feedback mechanism.

Based on our approach, there are a number of possible future studies: (1) The goal of this paper is to prove that one intelligent skill can guide the group to synchronization and there exists such a strategy for the skill. We believe that the efficiency of the algorithm for the skill can be improved by changing the heuristics and some parameter settings. (2) In this paper, the desired heading is zero. Actually, theorem 1 is true for any desired heading  $\theta^* \in (-\pi/2, \pi/2)$ . The related ‘consistent moving’ strategy can be obtained by the state transition diagram (Fig. S1 in Appendix S1) with some minor modifications. (3) The ‘consistent moving’ strategy provides an algorithm of how a skill moves from one agent location to another without putting any negative effect on the group. This provide a base for further development of more efficient strategies for the skill, as well as strategies for other coordination purposes of Vicsek-like models, such as circus movement of group, tracking of desired route, obstacle avoidance, etc. Moreover, the strategy of the skill to lead synchronization can be a base for other coordination purpose, because it will be much easier to guide the group to turn or move to a destination after the system is synchronized; (4) The strategy for the skill in 3-D space model, and the strategy for the skill in a speed consensus problem of a continuous model that includes both magnitude and direction deserve further investigation; (5) To adding more than one intelligent skills into the group, and to design strategies for the intelligent skills to cooperate or compete for collective motions of the group will be a challenging topic.

## References

- Reynolds C (1987) Flocks, birds, and schools: a distributed behavioral model. *Computer Graphics* 21: 25–34.
- Bonabeau E, Dorigo M, Theraulaz G (1999) *Swarm Intelligence: From Natural to Artificial Systems*, Oxford University Press, Oxford.
- Arenas A, Diaz-Guilera A, Kurths J, Moreno Y, Zhou C (2008) Synchronization in Complex Networks. *Physics Reports* 469: 93–153.
- Gómez-Gardenes J, Zamora-López G, Moreno Y, Arenas A (2010) From Modular to Centralized Organization of Synchronization in Functional Areas of the Cat Cerebral Cortex. *PLoS ONE* 5(8): e12313. doi:10.1371/journal.pone.0012313
- Wang Q, Chen G, Perc M (2011) Synchronous bursts on scale-free neuronal networks with attractive and repulsive coupling. *PLoS ONE* 6: e15851 (2011).
- Helbing D, Farkas I, Vicsek T (2000) Simulating dynamical features of escape panic. *Nature* 407: 487–490.
- Buhl J, Sumpter DJT, Couzin ID, Hale JJ, Despland E (2006) From disorder to order in marching locusts. *Science* 312: 1402–1406.
- Couzin ID, Krause J, Franks NR, Levin SA (2005) Effective leadership and decision making in animal groups on the move. *Nature* 433: 513–516.
- Ceccarelli N, Di Marco M, Garulli A, Giannitrapani A (2008) Collective circular motion of multivehicle systems. *Automatica* 44(12): 3025–3035.
- Colnari A, Dorigo M, Maniezzo V (1992) Distributed optimization by ant colonies. in: F.J. Varela and P. Bourgine (Eds.), *Proceedings of the 1st European Conference on Artificial Life*. 134–142.
- Liu JM, Han J, Tang YY (2002) Multi-agent oriented constraint satisfaction. *Artificial Intelligence* 136(1): 101–144.
- Hong Y, Chen G, Bushnell L (2008) Distributed observers design for leader-following control of multi-agent networks. *Automatica* 44(3): 846–850.
- Su H, Wang X, Lin Z (2009) Flocking of Multi-Agents With a Virtual Leader. *IEEE Trans Automat Contr* 54(2): 293–307.
- Monderer D, Tennenholtz M (2009) Strong mediated equilibrium. *Artificial Intelligence* 173(1): 180–195.
- Han J, Guo L, Li M (2005) Guiding a Group of Locally Interacting Autonomous Mobile Agents. *Proceedings of 24th Chinese Control Conference*, 184–187.
- Han J, Li M, Guo L (2006) Soft control on collective behavior of a group of autonomous agents by a skill agent. *Journal of Systems Science and Complexity* 19(1): 54–62.
- Wang X, Han J, Han H (2011) Special Agents Can Promote Cooperation in the Population. *PLoS ONE* 6(12): e29182.
- Stone P, Kraus S (2010) To teach or not to teach? Decision making under uncertainty in ad hoc teams. *Proceedings of the 9th International Conference on*

In fact, the intention of this paper is not only to complete a special coordination task of a specific MAS, but also to suggest a nondestructive intervention method by adding intelligent skills for other MASs as well. For example, adding intelligent skills in a multi-player group to change the group decision, adding intelligent skills in crowd to avoid panic, adding intelligent skills on internet to intervene public opinion, etc. On the other hand, this idea also provides a possible solution for the design of man-made MASs. To design a self-organized MAS to achieve an expected collective behavior requires a lot of skills in the design of local interaction rules. Adding one or more intelligent skills to coordinate the collective behavior can release designers from the hard work of subtle design.

In one word, this approach demonstrates the importance of using feedback for intervention. Intelligent skills can significantly outperform simple fixed-heading agents. As more attention has been paid to control and intervention of collective behavior, we need to design intelligent strategies for effective and efficient intervention for complex multi-agent systems and varieties of intervention purposes, not limited to synchronization only, but other patterns of collective movements as well.

## Supporting Information

**Appendix S1 Algorithm of ‘Consistent Moving’.**  
(PDF)

**Appendix S2 Mathematical Analysis.**  
(PDF)

**Video S1 Video to show the idea of how one intelligent skill intervene into the group and lead synchronization.**  
(WMV)

## Acknowledgments

The authors thank the anonymous reviewers for their helpful comments and suggestions. We also appreciate comments from Prof. John Holland, discussions on noise and fixed-heading skills from Prof. Zhixin Liu, revision ideas from Prof. Ming Li. Thanks to Prof. Yuhong Feng, Dr. Mingjia Guo and Dr. Xiaodong Yang for their careful proof reading.

## Author Contributions

Conceived and designed the experiments: JH. Performed the experiments: JH. Analyzed the data: JH. Contributed reagents/materials/analysis tools: JH. Wrote the paper: JH LW. Mathematical proof: LW.

- Autonomous Agents and Multiagent Systems: volume 1 - Volume 1 Pages 117–124.
19. Vicsek T, Czirok A, Ben-Jacob E, Cohen I, Shochet O (1995) Novel type of phase transitions in a system of self-driven particles. *Phys Rev Lett* 75: 1226–1229.
  20. Jadbabaie A, Lin J, Morse AS (2003) Coordination of groups of mobile autonomous agents using nearest neighbor rules. *IEEE Trans Automat Contr* 48: 988–1001.
  21. Yu H, Wang Y (2008) Coordinated collective motion of groups of autonomous mobile robots with directed interconnected topology. *Journal of Intelligent and Robotic Systems* 53(1): 87–98.
  22. Ren W, Beard RW (2008) *Distributed Consensus in Multi-vehicle Cooperative Control: Theory and Applications*. London: Springer-Verlag.
  23. Cao M, Morse AS, Anderson BDO (2008) Reaching a Consensus in a Dynamically Changing Environment: A Graphical Approach. *SIAM Journal on Control and Optimization* 47(2): 575–600.
  24. Cao M, Morse AS, Anderson BDO (2008) Reaching a Consensus in a Dynamically Changing Environment: Convergence Rates, Measurement Delays and Asynchronous Events. *SIAM Journal on Control and Optimization* 47(2): 601–623.
  25. Cao Y, Ren W (2012) Distributed Coordinated Tracking With Reduced Interaction via a Variable Structure Approach. *IEEE Trans Automat Contr* 57(1): 33–48.
  26. Liu ZX, Guo L (2009) Synchronization of multi-agent systems without connectivity assumptions. *Automatica* 45(12): 2744–2753.
  27. Tang G, Guo L (2007) Convergence of a class of multi-agent systems in probabilistic framework. *Journal of Systems Science and Complexity*, Vol. 20, No. 2, 173–197.
  28. Liu ZX, Guo L (2009) Synchronization of multi-agent systems without connectivity assumption. *Automatica* Vol. 45, 2744–2753.
  29. Wang L, Guo L (2008) Robust consensus and soft control of multi-agent systems with noises. *Journal of Systems Science and Complexity* 21(3): 406–415.
  30. Liu ZX, Han J, Hu XM (2011) The proportion of leaders needed for the expected consensus. *Automatica* 47: 2697–2703.
  31. Cucker F, Smale S (2007) Emergent behavior in flocks. *IEEE Transactions on Automatic Control* 52(5): 852–862.
  32. Tang GG, Guo L (2006) Convergence analysis of linearized Vicsek's model. In *Proceedings of the 25th Chinese Control Conference*, 379–382.
  33. Vicsek T, Zafeiris A (2012) Collective motion. *Physics Reports* 517: 71–140.
  34. Kunz H, Hemelrijk CK (2003) Artificial fish schools: collective effects of school size, body size, and body form. *Artif Life* 9(3): 237–253.
  35. Ballerini M, Cabibbo N, Candelier R, Cavagna A, Cisbani E, et al. (2008) Interaction ruling animal collective behavior depends on topological rather than metric distance: Evidence from a field study. In *Proceedings of National Academy of Sciences*, pp. 1232–1237.
